# Supplementary material for: Radiologic Predictors for Clinical Stage IA Lung Adenocarcinoma with Ground Glass Components: A Multi-Center Study of Long-Term Outcomes
Source: PubMed Central journal article supplement (PMC4560441; doi:10.1371/journal.pone.0136616), 2015-09-04
Supplement: pone.0136616.s004.pdf [file pone.0136616.s004.pdf]

# 上海市第一人民医院伦理委员会科研项目伦理批件

|                |                            |                 |                 |
|----------------|----------------------------|-----------------|-----------------|
| 批件编号 2014KY117 |                            | 审查日期 2014.11.11 | 项目编号 2014 科 114 |
| 项目名称           | 临床IA期非小细胞肺癌的病理特征的预测因素的临床研究 |                 |                 |
| 项目来源           | 上海交通大学附属第一人民医院             |                 |                 |
| 主要研究者          | 林强                         |                 |                 |
| 研究单位           | 上海交通大学附属第一人民医院             | 科室              | 胸外科             |

审查文件（含版本号）如下：

- (1) 研究方案
- (2) 知情同意书
- (3) 主要研究者履历

1、审查方式

会议审查     
 快速审查     
 紧急会议审查

2、审查结果

同意

3、该研究进行过程中将受伦理委员会的持续审查？ 是 否

审查频率为该研究批准之日起每    月一次

4、批件有效期为  一  年，至  2015年12月31号  止。

医院伦理委员会（盖章）

日期：2014年11月12日

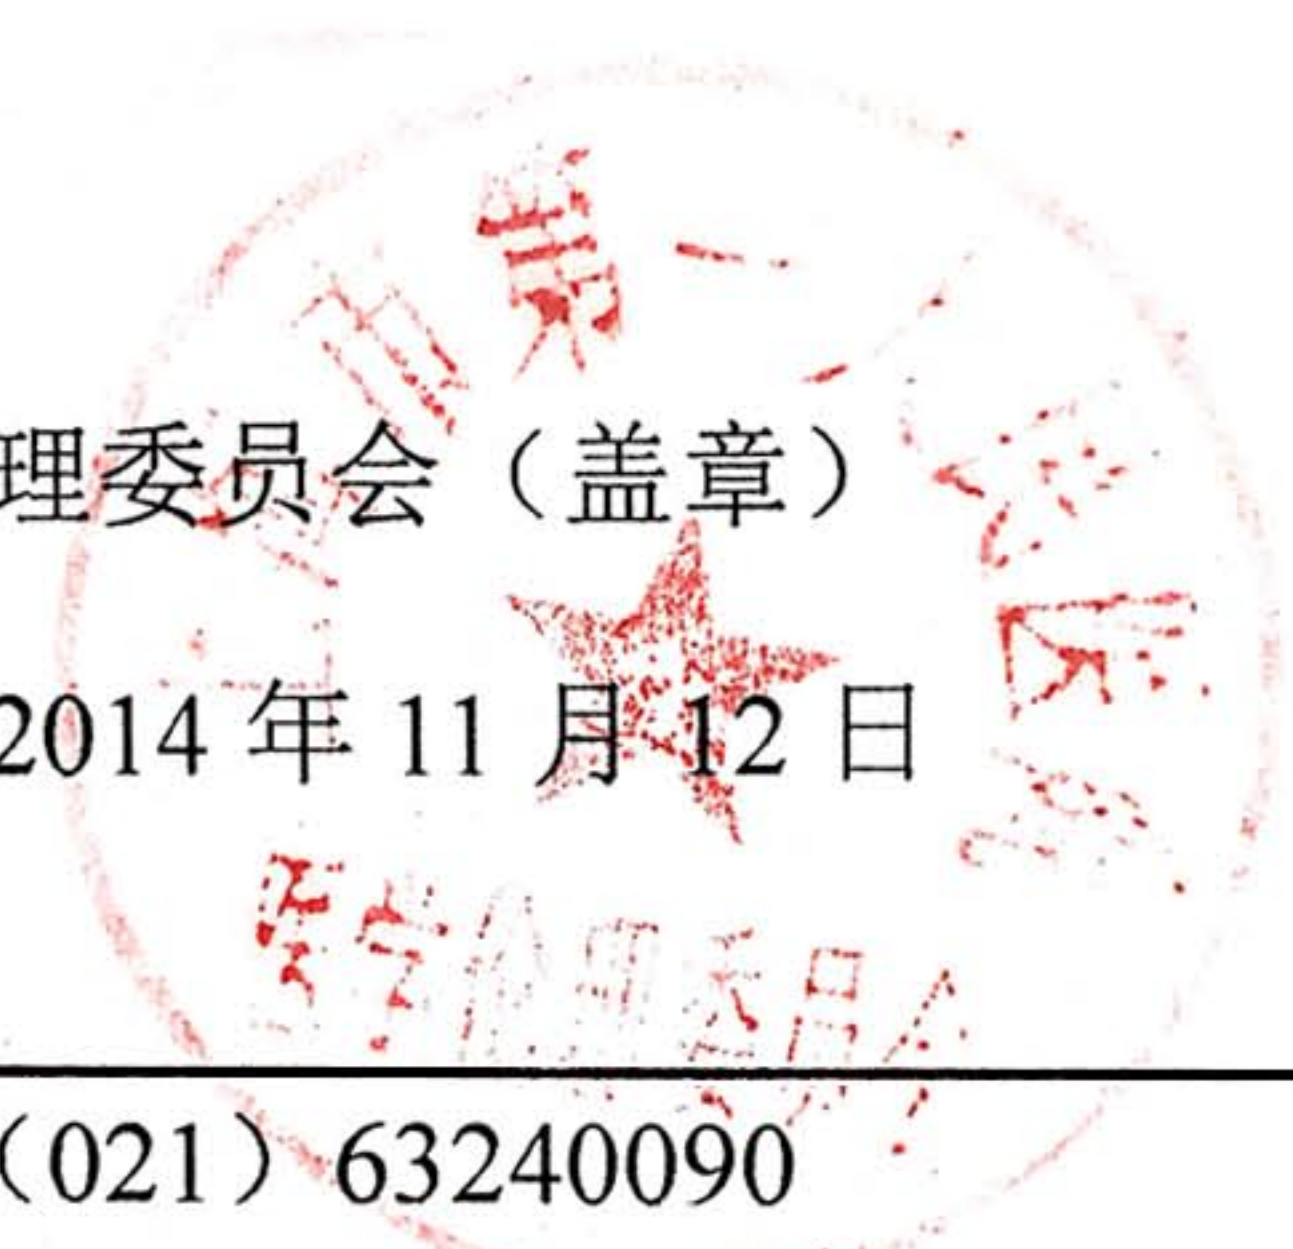

地址：海宁路100号（200080）

电话：（021）63240090
