# Supplementary material for: Radiologic Predictors for Clinical Stage IA Lung Adenocarcinoma with Ground Glass Components: A Multi-Center Study of Long-Term Outcomes
Source: PLOS journal article supplement (doi:10.1371/journal.pone.0136616), 2015-09-04
Supplement: S3 (10.1371/journal.pone.0136616.s003) [file journal.pone.0136616.s003]

## Research ethics approval of Shanghai First People's Hospital ethics committee

|                                                                                                                                                                                                                                                                                                                                                                                                                                                                                                                                                                                                                                                                                                                                                |                                                                                                                                  |                        |                      |
|------------------------------------------------------------------------------------------------------------------------------------------------------------------------------------------------------------------------------------------------------------------------------------------------------------------------------------------------------------------------------------------------------------------------------------------------------------------------------------------------------------------------------------------------------------------------------------------------------------------------------------------------------------------------------------------------------------------------------------------------|----------------------------------------------------------------------------------------------------------------------------------|------------------------|----------------------|
| Approval Document No. 2014KY117                                                                                                                                                                                                                                                                                                                                                                                                                                                                                                                                                                                                                                                                                                                |                                                                                                                                  | Review date 2014.11.11 | Item Number 2014.114 |
| Project Title                                                                                                                                                                                                                                                                                                                                                                                                                                                                                                                                                                                                                                                                                                                                  | Clinical research of predictive factors for pathologic features in patients with clinical stage IA<br>Non-Small Cell Lung Cancer |                        |                      |
| Project Source                                                                                                                                                                                                                                                                                                                                                                                                                                                                                                                                                                                                                                                                                                                                 | Shanghai First People's Hospital, Affiliated Shanghai Jiaotong University                                                        |                        |                      |
| Principal Investigator                                                                                                                                                                                                                                                                                                                                                                                                                                                                                                                                                                                                                                                                                                                         | Qiang Lin                                                                                                                        |                        |                      |
| Research Unit                                                                                                                                                                                                                                                                                                                                                                                                                                                                                                                                                                                                                                                                                                                                  | Shanghai First People's Hospital,<br>Affiliated Shanghai Jiaotong University                                                     | Department             | thoracic surgery     |
| <p>Review documents (including version number) as follows:</p> <p>(1) research program</p> <p>(2) Informed Consent</p> <p>(3) the principal investigator resume</p>                                                                                                                                                                                                                                                                                                                                                                                                                                                                                                                                                                            |                                                                                                                                  |                        |                      |
| <p>1. Review mode</p> <p style="padding-left: 40px;"> <input type="checkbox"/> meeting review              <input checked="" type="checkbox"/> quick review              <input type="checkbox"/> emergency meeting review         </p> <p>2, Result of the review</p> <p style="padding-left: 40px;">Agree</p> <p>3, whether the project would be reviewed of the research ethics committee continuously?</p> <p style="padding-left: 40px;"> <input type="checkbox"/> Yes <input checked="" type="checkbox"/> No         </p> <p>4, this document is valid for one year, expiring on December 31, 2015.</p> <div style="text-align: right; margin-top: 20px;"> <p>Medical Ethics Committee (stamp)</p> <p>Date: November 12, 2014</p> </div> |                                                                                                                                  |                        |                      |

Address: Haining Road 100(200080)

Tel: (021) 63240090
